# Supplementary material
Source: PubMed Central journal article supplement (PMC4903071)
Supplement: NIHMS68509-supplement-Supplementary_Figures.pdf [file NIHMS68509-supplement-Supplementary_Figures.pdf]

## **On-line Data Supplement**

**Title:** Longitudinal trends in hypertension management and mortality among octogenarians. Prospective cohort study

**Authors:** Alex Dregan, Rathi Ravindrarajah, Nisha Hazra, Shota Hamada, Stephen HD Jackson, Martin C Gulliford

**Correspondence:** Dr Alex Dregan, Department of Primary Care and Public Health, 5th Floor, Addison House, Guy's Campus, London, SE1 1UL, UK. Tel: 0207 8486639, Email: alexandru.dregan@kcl.ac.uk.

### **Contents:**

- Supplementary Figure S1
- Supplementary Figure S2
- Supplementary Figure S3
- Supplementary Figure S4

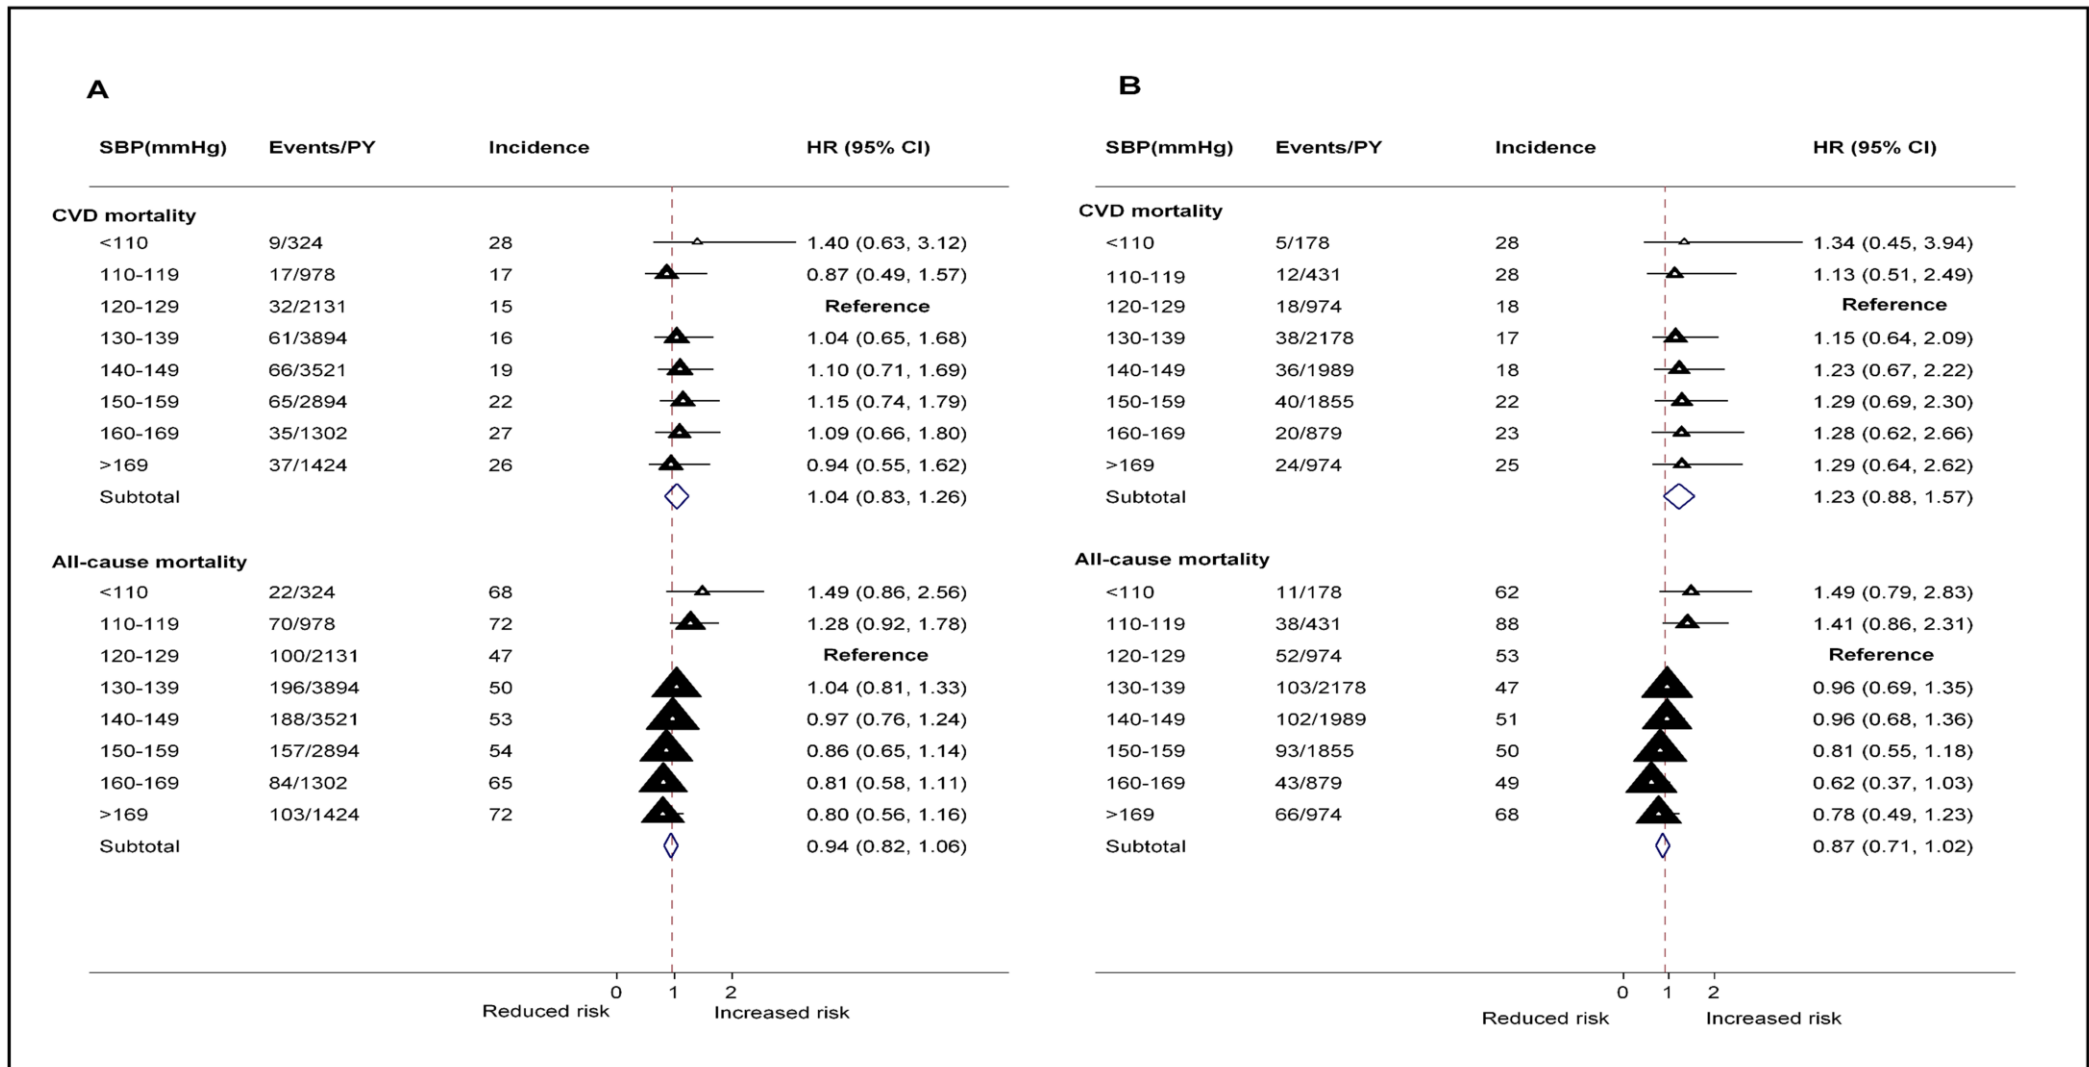

Figure S1 Adjusted hazard ratios (HR) for mortality by systolic blood pressure (SBP) levels among total (A, N=2270) and treated (B, N=1041) octogenarians after excluding baseline CVD. The analyses adjusted for age, gender, cholesterol, BMI, chronic illness (CVD, type 2 diabetes, arthritis, cancer, liver disease and chronic kidney disease), smoking, physical activity, depression, antihypertensive therapy (for overall analyses), social class, diastolic blood pressure. Note: SBP=systolic blood pressure; PY=person-years; CVD=cardiovascular disease.

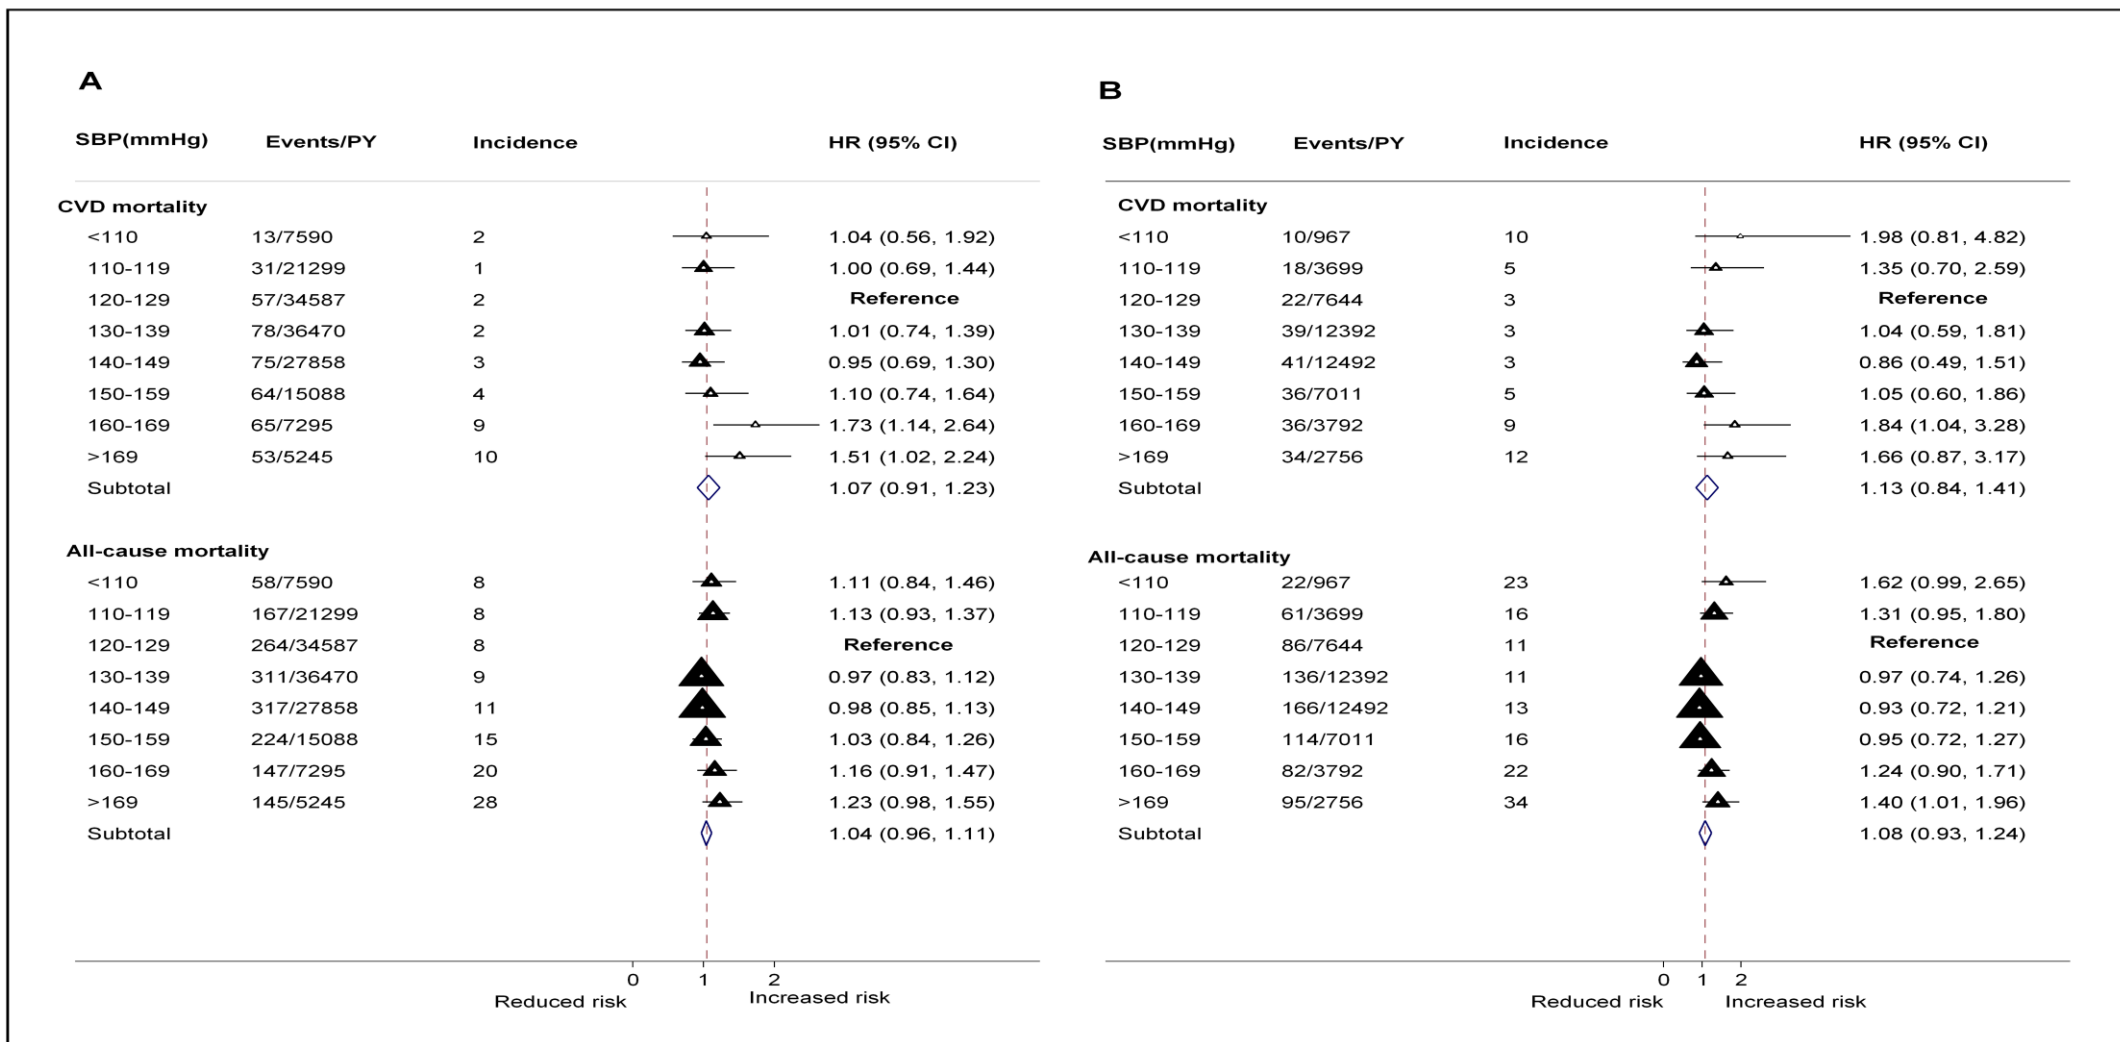

**Figure S2** Adjusted hazard ratios (HR) for mortality by systolic blood pressure (SBP) levels among total (A, N=19968) and treated (B, N=5611) people age 50 to 79 after excluding baseline CVD. The analyses adjusted for age, gender, cholesterol, BMI, chronic illness (type 2 diabetes, arthritis, cancer, liver disease and chronic kidney disease), smoking, physical activity, depression, antihypertensive therapy (for overall analyses), social class, diastolic blood pressure. Note: SBP=systolic blood pressure; PY=person-years; CVD=cardiovascular disease.

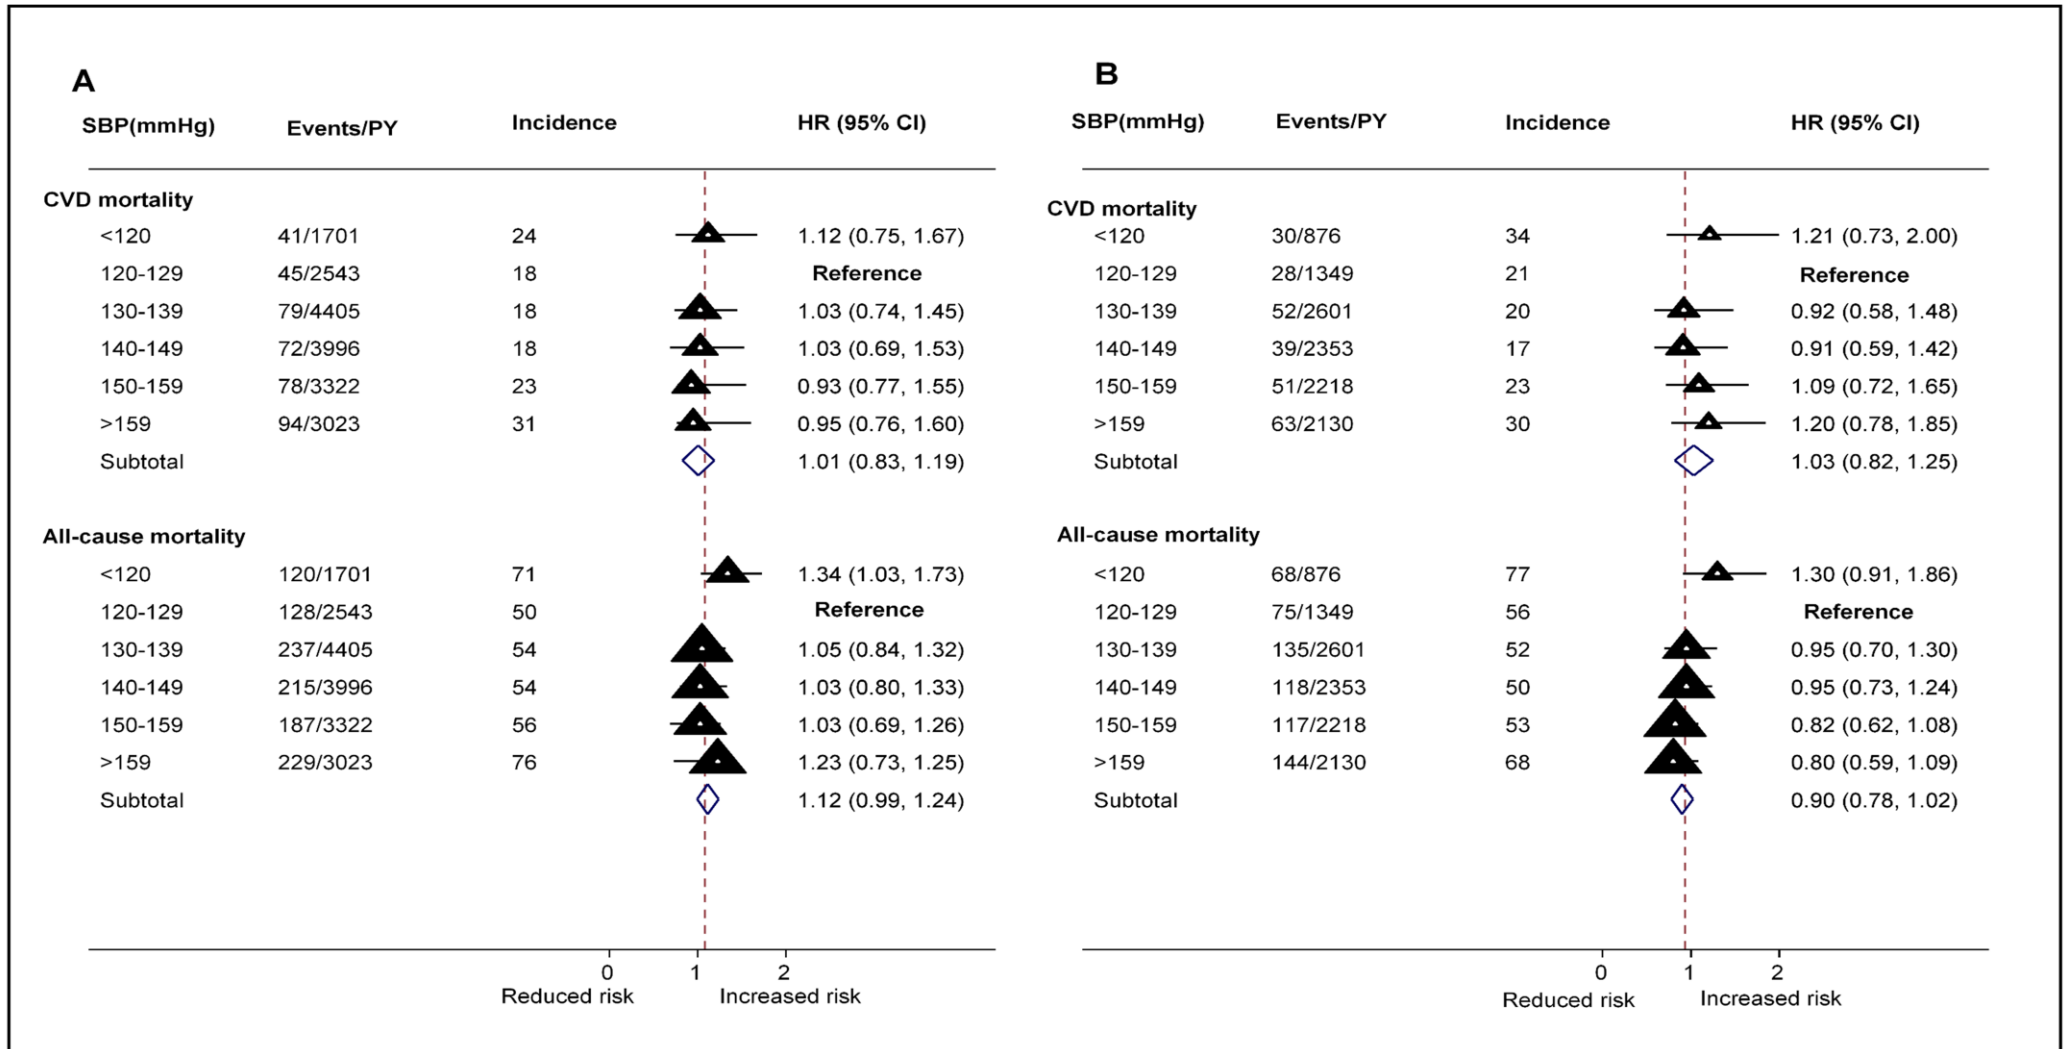

**Figure S3 Adjusted hazard ratios (HR) for mortality by systolic blood pressure (SBP) levels among total (A, N=2692) and treated (B, N=1299) octogenarians using restricted SBP categories. The analyses adjusted for age, gender, cholesterol, BMI, chronic illness (type 2 diabetes, arthritis, cancer, liver disease and chronic kidney disease), smoking, physical activity, depression, antihypertensive therapy (for overall analyses), social class, diastolic blood pressure. Note: SBP=systolic blood pressure; PY=person-years; CVD=cardiovascular disease.**

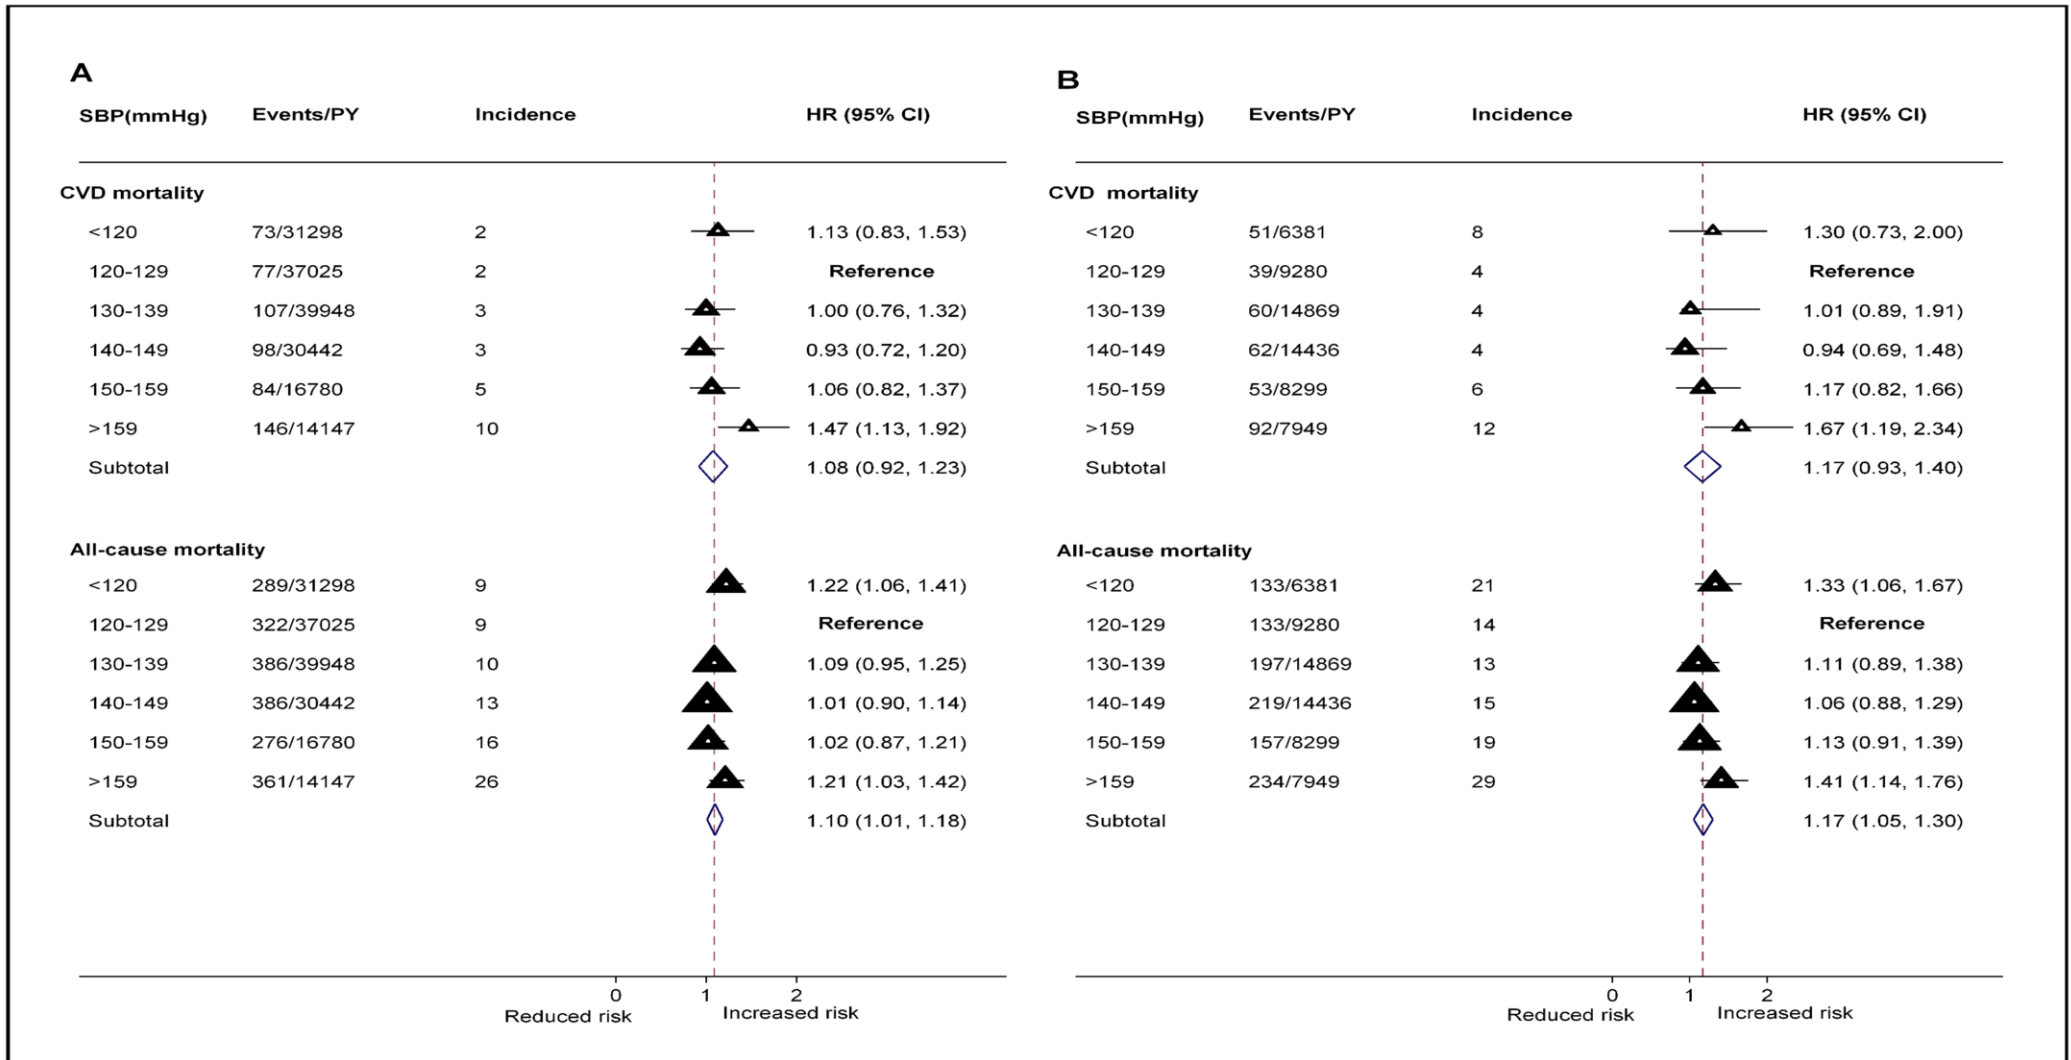

Figure S4 Adjusted hazard ratios (HR) for mortality by systolic blood pressure (SBP) levels among total (A, N=22007) and treated (B, N=6311) people age 50 to 79 using restricted SBP categories. The analyses adjusted for age, gender, cholesterol, BMI, chronic illness (CVD, type 2 diabetes, arthritis, cancer, liver disease and chronic kidney disease), smoking, physical activity, depression, antihypertensive therapy (for overall analyses), social class, diastolic blood pressure. Note: SBP=systolic blood pressure; PY=person-years; CVD=cardiovascular disease.
